# Supplementary material for: Cangxitongbi capsule protects articular cartilage of the knee in rats by regulating ADAMTS-5
Source: PubMed Central journal article supplement — Ann Transl Med. 2020 Nov;8(22):1511. doi: 10.21037/atm-20-7011 (PMC7729305; doi:10.21037/atm-20-7011), 2020-11
Supplement: atm-08-22-1511-dss.pdf [file atm-08-22-1511-dss.pdf]

## Data Sharing Statement

|                     |                                                                                                                                                     |                                                                                                                                                                                                                                                                                     |
|---------------------|-----------------------------------------------------------------------------------------------------------------------------------------------------|-------------------------------------------------------------------------------------------------------------------------------------------------------------------------------------------------------------------------------------------------------------------------------------|
| <b>Article Info</b> | <a href="http://dx.doi.org/10.21037/atm-20-7011">http://dx.doi.org/10.21037/atm-20-7011</a>                                                         |                                                                                                                                                                                                                                                                                     |
| <b>Item</b>         | <b>Question</b>                                                                                                                                     | <b>Authors' Response<br/>(place "-" if not applicable)</b>                                                                                                                                                                                                                          |
| 1                   | Would you like to share data collected for your study to others?                                                                                    | No.                                                                                                                                                                                                                                                                                 |
| 2                   | If not, would you like to share the reason for your decision?                                                                                       | This study was supported by the Shandong Province Science and Technology Development Plan of Traditional Chinese Medicine (2017-064) and Jinan City Science and Technology Development Plan (201805044). These research projects are not completed, so the data can't be disclosed. |
| 3                   | What data in particular will be shared?                                                                                                             | -                                                                                                                                                                                                                                                                                   |
| 4                   | Any other documents will be shared? Such as study protocol, statistical analysis plan, informed consent form, clinical study report, analytic code. | No.                                                                                                                                                                                                                                                                                 |
| 5                   | When will data availability begin?                                                                                                                  | -                                                                                                                                                                                                                                                                                   |
| 6                   | When will data availability end?                                                                                                                    | -                                                                                                                                                                                                                                                                                   |
| 7                   | To whom will you share the data?                                                                                                                    | -                                                                                                                                                                                                                                                                                   |
| 8                   | For what type of analysis or purpose?                                                                                                               | -                                                                                                                                                                                                                                                                                   |
| 9                   | How or where can the data/documents be obtained?                                                                                                    | -                                                                                                                                                                                                                                                                                   |
| 10                  | Any other restrictions?                                                                                                                             | -                                                                                                                                                                                                                                                                                   |
